# Supplementary material for: Racial Disparities and Sex Differences in Early- and Late-Onset Colorectal Cancer Incidence, 2001–2018
Source: PubMed Central journal article supplement (PMC8459723; doi:10.3389/fonc.2021.734998), 2021-09-09

**Supplemental Figure S4.** Colorectal cancer incidence rates and male-to-female (M/F) incidence rate ratios by A) early- and B) late-onset and subsite, US Cancer Statistics 2001-2018.

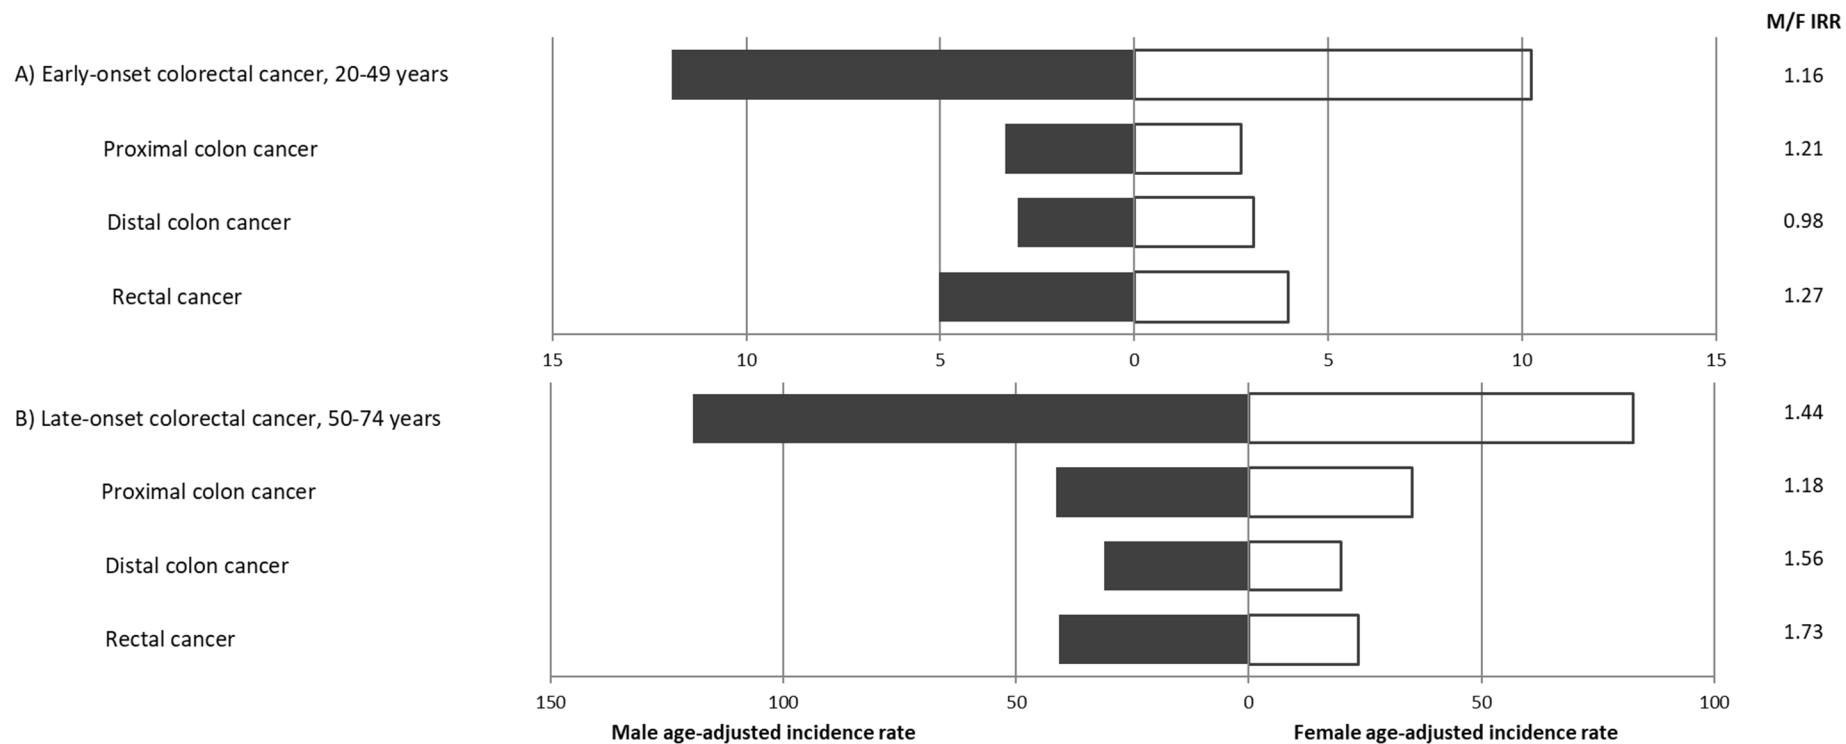

Supplement: Image_4.pdf [file Image_4.pdf]
