# Supplementary material for: Racial Disparities and Sex Differences in Early- and Late-Onset Colorectal Cancer Incidence, 2001–2018
Source: Front Oncol. 2021 Sep 9;11:734998. doi: 10.3389/fonc.2021.734998 (PMC8459723; doi:10.3389/fonc.2021.734998)
Supplement: Supplementary file 13 [file Table_8.xlsx]

## Sheet: T1_age
Table 1. Age-adjusted liver cancer incidence rates per 100,000 person-years (1978-1982 and 2008-2012).
Age		2001				2016				Trend 1	Trend 2	Joinpoint	AAPC	AAPC 95% CI
		Cases	Rate	95% CI		Cases	Rate	95% CI		APC (%)	APC (%)		(%)
20-49
Proximal
Cecum
Ascending
Transverse
Distal
Decending
Sigmoid
Rectal
Rectosigmoid Junction
Rectum
50-74
Proximal
Cecum
Ascending
Transverse
Distal
Decending
Sigmoid
Rectal
Rectosigmoid Junction
Rectum
Uganda						365	8.1	(7.0, 9.1)		2.6			2.6	(-3.8, 9.5)
Eastern Asia
China						17579	13.5	(13.3, 13.7)		-1.9*			-1.9*	(-2.3, -1.4)
Japan		9485	16.2	(15.9, 16.6)		23325	14.3	(14.1, 14.5)		2.5	-4.0*	1995	-0.8	(-1.8, 0.2)
Korea						14243	20.4	(20.0, 20.7)		-2.2*			-2.2*	(-3.2, -1.2)
South-Eastern Asia
Phillipines						2331	8.8	(8.4, 9.2)		-1.7*			-1.7*	(-2.7, -0.6)
Thailand						2381	20.4	(19.5, 21.3)		2.3*			2.3*	(0.2, 4.4)
South-Western Asia
India						2745	3	(2.9, 3.2)		1.7*			1.7*	(1.2, 2.1)
Israel		495	2	(1.8, 2.2)		1026	1.9	(1.8, 2.1)		-1.7			-1.7	(-4.3, 0.9)
Kuwait		26	2.6	(1.5, 3.6)		142	4.1	(3.4, 4.8)		-0.5			-0.5	(-2.7, 1.8)
Central and Eastern Europe
Belarus						2007	2.6	(2.4, 2.7)		-0.8			-0.8	(-2.3, 0.7)
Czech Republic						4546	4.3	(4.2, 4.5)		-0.3			-0.3	(-0.9, 0.3)
Poland						280	2.2	(1.9, 2.5)		-2.6			-2.6	(-7.3, 2.4)
Slovakia		1202	3.8	(3.5, 4.0)		1266	4.9	(4.6, 5.2)		-0.1*	2.4*	2000	0.7*	(0.7, 0.7)
North-Western Europe
Denmark		1201	2.7	(2.6, 2.9)		1797	3.4	(3.2, 3.5)		-0.4*	3.2*	2000	0.8*	(0.7, 0.8)
Iceland		33	2.3	(1.5, 3.1)		72	2.8	(2.1, 3.5)		0.7			0.7	(-1.9, 3.4)
Ireland						1080	3.2	(3.0, 3.4)		6.7*			6.7*	(6.2, 7.2)
Norway		418	1.3	(1.1, 1.4)		939	2.1	(1.9, 2.2)		-0.7	3.4	1995	1.4	(-0.1, 2.9)
Sweden1		3063	3.6	(3.4, 3.7)		2820	3.1	(2.9, 3.2)		-0.9			-0.9	(-2.5, 0.7)
United Kingdom						20844	3.4	(3.4, 3.5)		4.4*			4.4*	(3.9, 4.9)
North-Eastern Europe
Estonia						475	3.4	(3.0, 3.7)		0.8*			0.8*	(0.1, 1.4)
Finland1		1043	3	(2.8, 3.2)		2481	3.9	(3.7, 4.1)		0.7			0.7	(-0.5, 1.8)
Latvia						439	3.4	(3.1, 3.8)		1.7*			1.7*	(0.6, 2.8)
Lithuania						992	3.2	(3.0, 3.4)		1.9*			1.9*	(0.3, 3.5)
Southern Europe
Croatia						2518	5.4	(5.1, 5.6)		2.2			2.2	(-1.0, 5.4)
Italy		270	5.2	(4.6, 5.9)		934	9.8	(9.0, 10.5)		5.2*	-2.6	2000	2.5*	(0.9, 4.1)
Malta						103	2.5	(2.0, 3.1)		3.8			3.8	(-0.3, 8.1)
Slovenia						833	3.9	(3.6, 4.2)		4.1*			4.1*	(2.2, 6.0)
Spain		214	3.8	(3.3, 4.4)		467	5.8	(5.2, 6.4)		1.9*			1.9*	(0.9, 2.9)
Western Europe
Austria						298	4.3	(3.8, 4.8)		2.6			2.6	(-0.9, 6.3)
France		436	2.9	(2.6, 3.2)		2227	7.1	(6.8, 7.5)		5.5*	0.8	1995	3.1*	(2.1, 4.1)
Germany		235	2.6	(2.2, 2.9)		633	5.4	(4.9, 5.9)		2.8*			2.8*	(2.1, 3.6)
The Netherlands						2675	1.8	(1.7, 1.9)		2.4*			2.4*	(0.2, 4.7)
Switzerland		369	4	(3.6, 4.5)		769	6.2	(5.7, 6.6)		1.9*			1.9*	(1.1, 2.7)
North America
Canada		1527	1.4	(1.3, 1.5)		8189	3.8	(3.7, 3.9)		3.4*			3.4*	(2.9, 3.9)
Costa Rica		54	2.9	(2.0, 3.7)		777	3.6	(3.3, 3.9)		1.4*			1.4*	(0.2, 2.7)
Puerto Rico		382	2.3	(2.1, 2.6)		1705	5	(4.7, 5.2)		3.2*			3.2*	(1.8, 4.5)
United States2		2539	1.8	(1.8, 1.9)		13130	5.8	(5.7, 5.9)		4.0*			4.0*	(3.9, 4.2)
South America
Brazil						221	3.4	(3.0, 3.9)		2.1			2.1	(-7.6, 12.8)
Colombia						470	3.9	(3.5, 4.3)		2.8*			2.8*	(2.1, 3.6)
Ecuador						417	4.2	(3.7, 4.7)		2.6*			2.6*	(0.8, 4.3)
Oceania
Australia						6291	4.3	(4.2, 4.4)		4.9*			4.9*	(4.4, 5.3)
New Zealand						1413	4.1	(3.8, 4.3)		3.4*			3.4*	(2.9, 4.0)
*Statistically significant at the 0.05 level
NRegistry contributed national level data
1Data provided by the NORDCAN database for years 2008-2012
2Includes SEER 9 registries (Atlanta, Connecticut, Detroit, Hawaii, Iowa, New Mexico, San Fransisco-Oakland, Seattle-Puget Sound, and Utah)

## Sheet: TableS8
Supplemental Table S8. Age‐adjusted late‐onset (≥50 years of age) colorectal cancer incidence rates per 100,000 person‐years.
≥50 Years	2001-2002						2017-2018						Trend 1	Trend 2	Trend 3	Joinpoint 1	Joinpoint 2	AAPC	AAPC 95% CI
	Cases	Rate	95% CI	IRR	95% CI		Cases	Rate	95% CI	IRR	95% CI		APC (%)	APC (%)	APC (%)			(%)
All Colorectal Cancer
Non-Hispanic White	231705	179.932	(179.20, 180.67)	1	–		180377	107.604	(107.10, 108.11)	1	–		-3.71*	-2.39*		2011-2012		-3.22*	(-3.63, -2.80)
Non-Hispanic Black	26575	201.517	(199.07, 203.99)	1.11996	(1.11, 1.13)		29178	126.276	(124.78, 127.78)	1.17352	(1.16, 1.19)		-1.53	-3.39*		2005-2006		-2.93*	(-3.33, -2.52)
Hispanic	13169	147.29	(144.69, 149.92)	0.818583	(0.80, 0.83)		21600	99.1458	(97.78, 100.53)	0.921393	(0.91, 0.93)		-2.55*					-2.55*	(-2.80, -2.30)
American Indian/Alaskan Native	1045	141.042	(132.15, 150.37)	0.783859	(0.74, 0.83)		1659	111.261	(105.75, 116.99)	1.03399	(0.99, 1.09)		-1.28*					-1.28*	(-1.88, -0.68)
Asian/Pacific Islander	6177	138.681	(135.11, 142.32)	0.770742	(0.75, 0.79)		9609	86.5029	(84.75, 88.28)	0.803898	(0.79, 0.82)		-2.86*					-2.86*	(-3.03, -2.69)
Proximal Colon Cancer
Non-Hispanic White	100580	77.7502	(77.27, 78.23)	1	–		79605	47.3694	(47.04, 47.70)	1	–		-3.16*					-3.16*	(-3.38, -2.95)
Non-Hispanic Black	11936	91.6019	(89.94, 93.28)	1.17816	(1.16, 1.20)		13130	58.2388	(57.21, 59.28)	1.22946	(1.21, 1.25)		-1.17	-3.40*				-2.85*	(-3.16, -2.53)
Hispanic	4903	57.2203	(55.57, 58.90)	0.735951	(0.72, 0.76)		8224	40.0765	(39.18, 40.99)	0.846042	(0.83, 0.87)		-0.78	-3.15	-2.19*	2005-2006	2011-2012	-2.20*	(-2.56, -1.85)
American Indian/Alaskan Native	362	50.6817	(45.32, 56.49)	0.651853	(0.59, 0.72)		598	42.2048	(38.75, 45.89)	0.890972	(0.82, 0.97)		-1.11					-1.11	(-2.29, 0.09)
Asian/Pacific Islander	1963	47.0858	(44.95, 49.29)	0.605604	(0.58, 0.63)		2899	27.1131	(26.12, 28.14)	0.572376	(0.55, 0.59)		-3.30*					-3.30*	(-3.59, -3.01)
Distal Colon Cancer
Non-Hispanic White	56588	44.1327	(43.77, 44.50)	1	–		38054	22.7914	(22.56, 23.03)	1	–		-5.08*	-2.56*		2011-2012		-4.14*	(-4.76, -3.51)
Non-Hispanic Black	6607	49.6493	(48.44, 50.88)	1.125	(1.10, 1.15)		6374	26.9031	(26.22, 27.60)	1.18041	(1.15, 1.21)		-4.00*					-4.00*	(-4.33, -3.67)
Hispanic	3468	37.9645	(36.67, 39.30)	0.860235	(0.83, 0.89)		5057	22.2776	(21.64, 22.93)	0.977456	(0.95, 1.01)		-3.37*					-3.37*	(-3.69, -3.04)
American Indian/Alaskan Native	281	38.2041	(33.65, 43.20)	0.865664	(0.77, 0.97)		384	24.9905	(22.46, 27.74)	1.09649	(0.99, 1.21)		-2.12*					-2.12*	(-3.05, -1.19)
Asian/Pacific Islander	1961	42.9994	(41.05, 45.02)	0.974321	(0.93, 1.02)		2833	24.9748	(24.05, 25.93)	1.0958	(1.05, 1.14)		-3.31*					-3.31*	(-3.58, -3.04)
Rectal Cancer
Non-Hispanic White	60370	47.1416	(46.77, 47.52)	1	–		51607	30.9036	(30.63, 31.18)	1	–		-3.34*	-1.36*		2011-2012		-2.60*	(-2.88, -2.32)
Non-Hispanic Black	5886	43.3863	(42.27, 44.53)	0.92034	(0.90, 0.95)		7611	31.6763	(30.95, 32.42)	1.025	(1.00, 1.05)		-2.02*					-2.02*	(-2.44, -1.61)
Hispanic	3924	41.448	(40.11, 42.82)	0.879223	(0.85, 0.91)		6926	29.8789	(29.15, 30.62)	0.966842	(0.94, 0.99)		-2.08*					-2.08*	(-2.42, -1.74)
American Indian/Alaskan Native	323	40.1661	(35.68, 45.07)	0.852031	(0.76, 0.95)		570	36.6683	(33.60, 39.94)	1.18654	(1.09, 1.29)		-0.60					-0.60	(-1.33, 0.14)
Asian/Pacific Islander	2021	43.0812	(41.15, 45.08)	0.913868	(0.87, 0.96)		3433	30.1861	(29.17, 31.23)	0.976783	(0.94, 1.01)		-2.17*					-2.17*	(-2.37, -1.98)
*Statistically significant at the 0.05 level.
IRR, incidence rate ratio; CI, confidence interval; APC, annual percent change; AAPC, average annual percent change.
